# Supplementary material for: MicroRNA-875-5p inhibits tumor growth and metastasis of hepatocellular carcinoma by targeting eukaryotic translation initiation factor 3 subunit a
Source: PubMed Central journal article supplement — Oncol Rep. 2020 Aug 19;44(5):2067–79. doi: 10.3892/or.2020.7743 (PMC7551348; doi:10.3892/or.2020.7743), 2020-08-19

Figure S1. Changes in body weight in the mice for the xenograft model (A) and for the metastatic model (B). (C) The HCCLM3 cell lines overexpressing miR-875-5p and control to be injected into the tail vein were subjected to RT-qPCR to detect miR-875-5p expression level. (D) The miR-875-5p expression in lung metastatic nodules was detected by RT-qPCR. (E) The miR-875-5p expression in HCCLM3 cells transfected with miR-875-5p along or accompanied by eIF3a overexpression plasmid was determined by RT-qPCR. \* $P < 0.05$ . \*\*\* $P < 0.001$ .

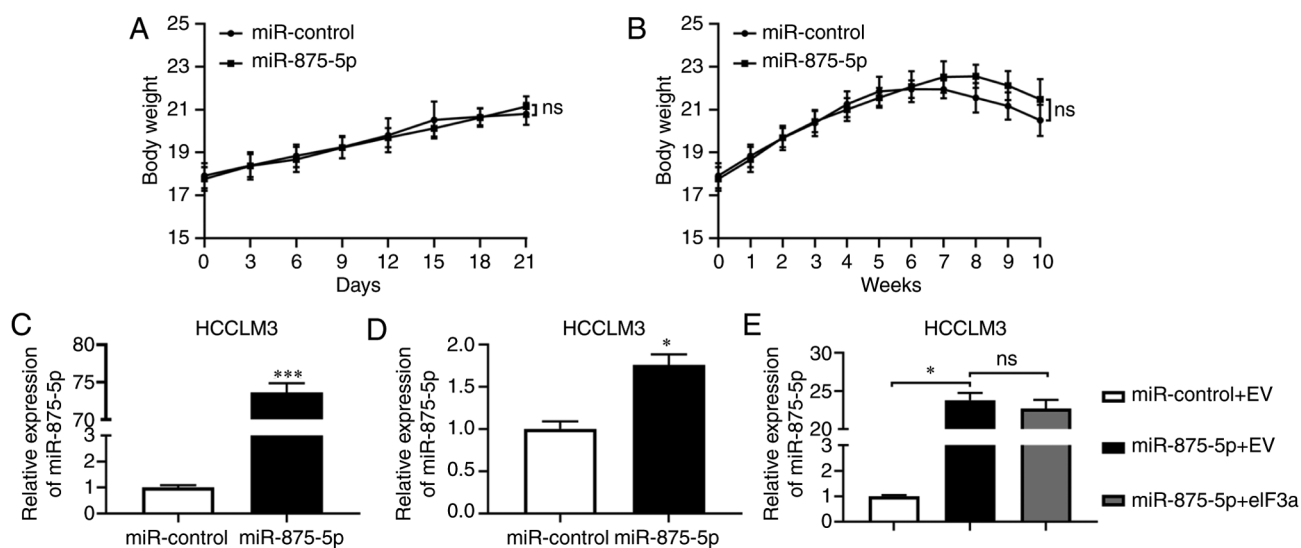

Supplement: Supplementary_Data.pdf [file Supplementary_Data.pdf]
